# Supplementary material for: Elaborate control over the morphology and structure of mercapto-functionalized mesoporous silicas as multipurpose carriers
Source: Royal Society of Chemistry journal article supplement (doi:10.1039/c0dt00194e), 2010-01-01
Supplement: c0dt00194e.pdf [file c0dt00194e.pdf]

## Supplementary Information

### Elaborate control over the morphology and structure of mercapto-functionalized mesoporous silicas as multipurpose carriers

Xin Du<sup>ab</sup>, Junhui He<sup>\*a</sup>

\* To whom correspondence should be addressed. Tel.: +86-10-82543535; Fax: +86-10-82543535;

e-mail: jhhe@mail.ipc.ac.cn

<sup>a</sup> Functional Nanomaterials Laboratory and Key Laboratory of Photochemical Conversion and Optoelectronic Materials, Technical Institute of Physics and Chemistry, Chinese Academy of Sciences (CAS), Zhongguancun Beiyitiao 2, Haidianqu, Beijing 100190, China

<sup>b</sup> Graduate University of Chinese Academy of Sciences, CAS, Beijing 100049, China

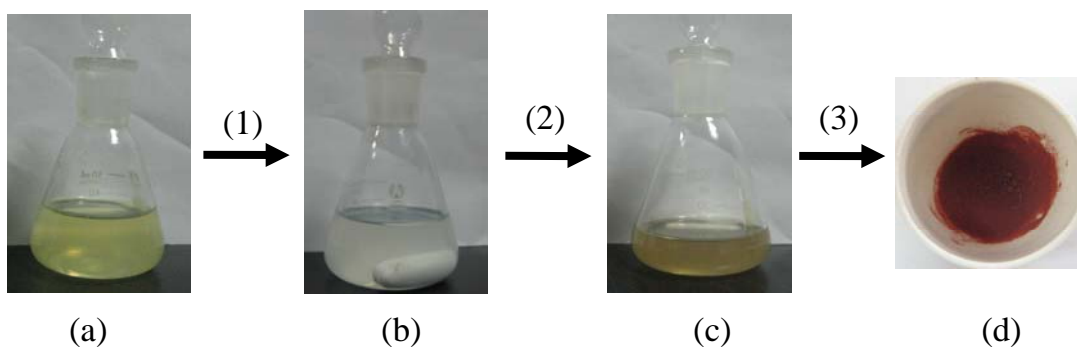

**Fig. S1.** Colors of the reaction mixture at different stages. (a) the initial mixture of silica nanorods and aqueous  $\text{HAuCl}_4$  presented yellow color; (b) the mixture turned colorless after stirring at room temperature for 3 h (1); (c) the mixture became pale red after addition of a given volume of aqueous  $\text{NaBH}_4$  (2); (d) a dark red product was obtained after calcination at  $550\text{ }^\circ\text{C}$  for 3 h (3).

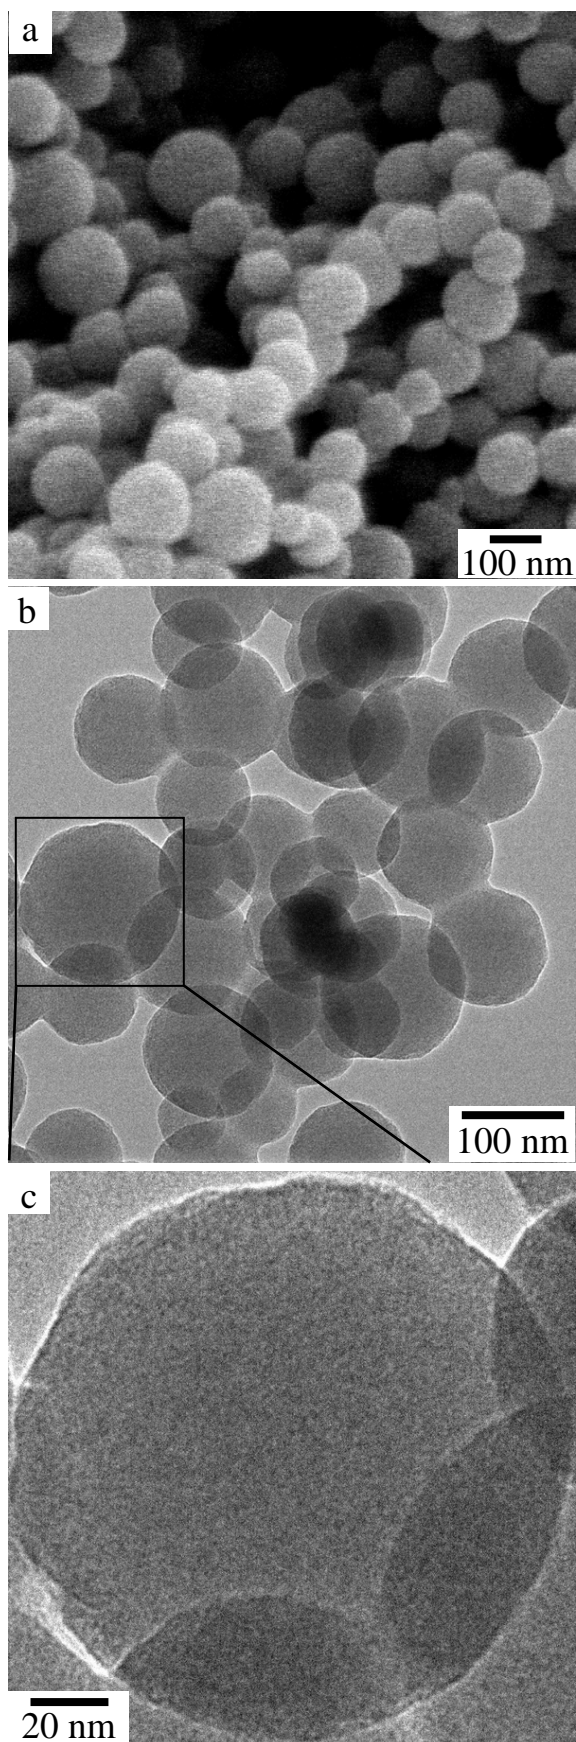

**Fig. S2.** SEM (a) and TEM (b,c) images of extracted S7-0.30.

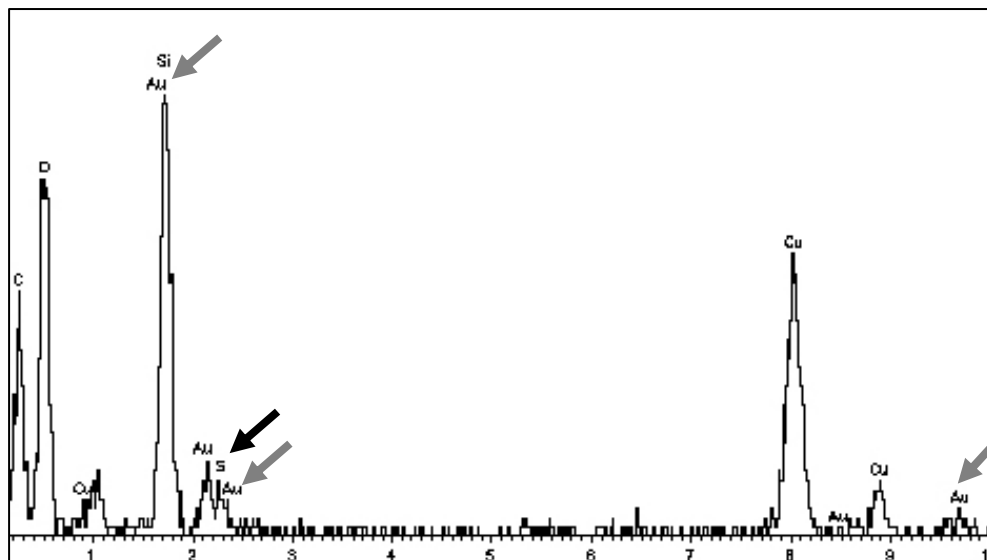

**Fig. S3.** EDX spectrum of uncalcined Au@SiO<sub>2</sub> (extracted S4-0.10 as carrier). The presence of S (black arrow) and Au (gray arrows) elements is clearly shown, suggesting successful functionalization by mercapto (HS-) groups and loading of Au nanoparticles in the mesopores of silica nanorods, respectively. The presence of C and Cu elements is attributed to carbon-coated copper grid.

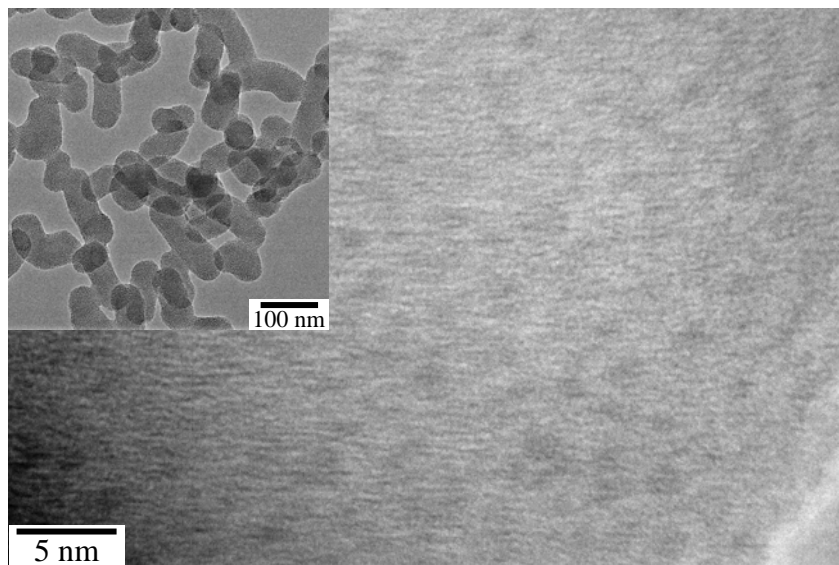

**Fig. S4.** TEM images of uncalcined Au@SiO<sub>2</sub> nanorods (extracted S3-0.08 as carrier).

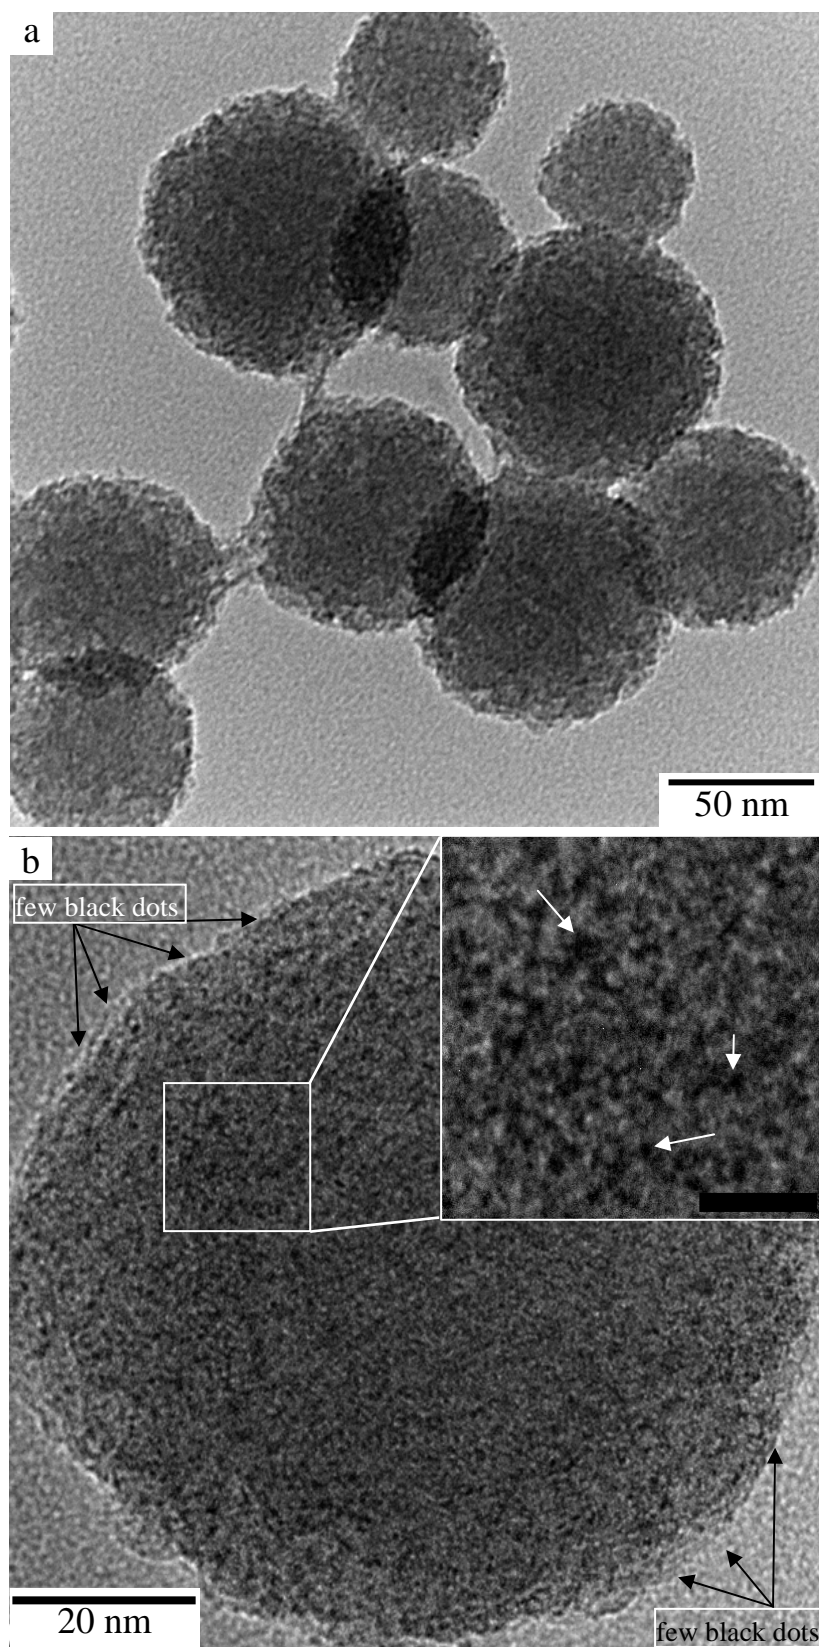

**Fig. S5.** TEM images of uncalcined Au@SiO<sub>2</sub> nanospheres (S3-0.10-10 silica nanospheres as carrier). The scale bar in (b) is 5 nm.

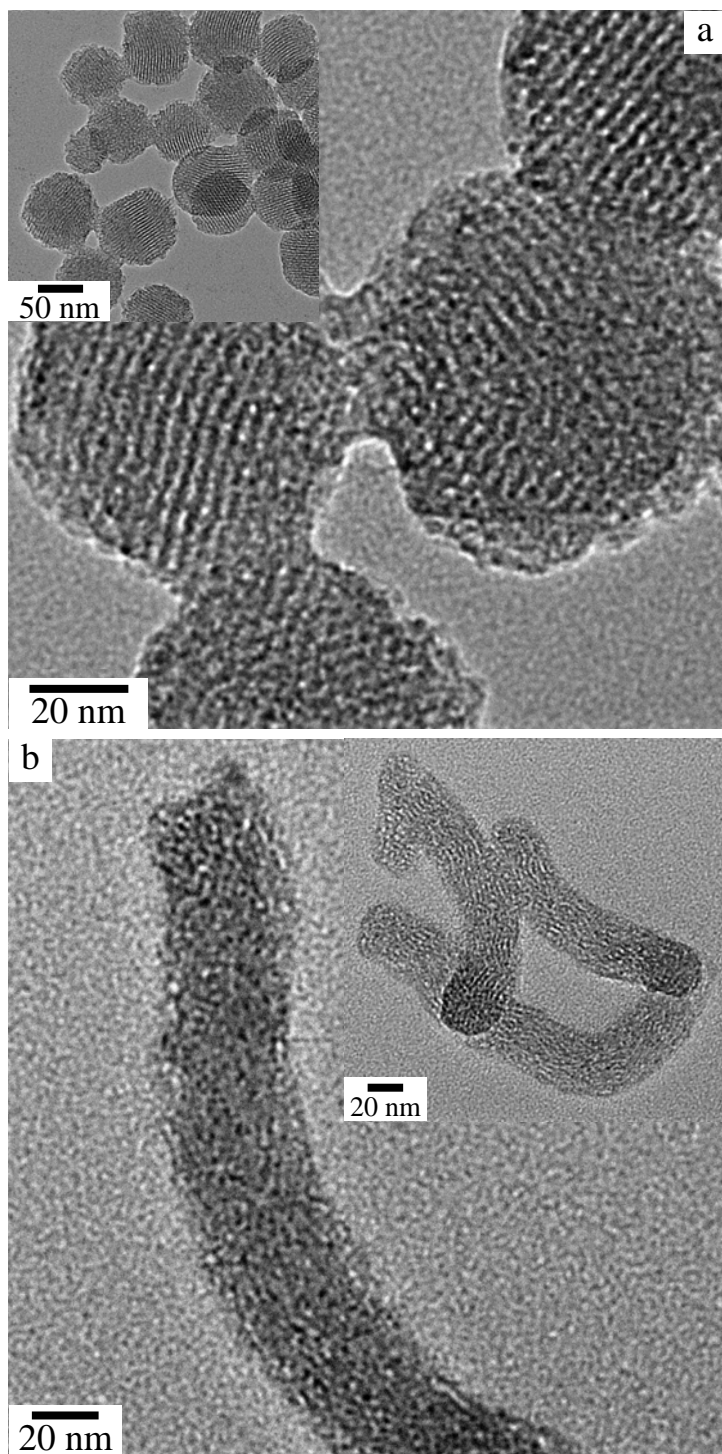

**Fig. S6.** TEM images of uncalcined Au@SiO<sub>2</sub> nanospheres (calcined S1-0.00 silica nanospheres as carrier) and Au@SiO<sub>2</sub> nanorods (calcined S4-0.10 silica nanorods as carrier).
